# Supplementary material for: Three-dimensional Organization of Polytene Chromosomes in Somatic and Germline Tissues of Malaria Mosquitoes
Source: MDPI journal article supplement (doi:10.3390/cells9020339), 2020-02-01
Supplement: s1 [file s1]

**Supplementary File 2:** Scatter-plots showing the dependence of the Chr-Chr contacts (Y-axis) against the Chr-NE contacts (X-axis) in individual chromosomes of malaria mosquitoes.

**Chromosome X**

X: 21.1, 30.7, 24.2, 28.8, 33.8, 23.1

Y: 7.2, 24.8, 10.3, 12.5, 10.1, 41.8

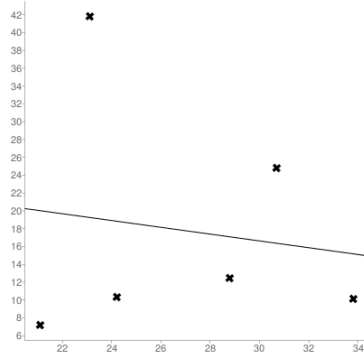

Sample size: 6

Mean  $\bar{x}$ : 26.95

Mean  $\bar{y}$ : 17.7833333333333

Intercept (a): 28.041993416794

Slope (b): -0.38065529066644

Regression line equation:  $y = 28.041993416794 - 0.38065529066644x$

Correlation coefficient (r): -0.14108030643834

$r^2 = 0.019903652864736$ . The P-Value is 0.789902. The result is not significant at  $p < 0.05$

**2L**

X: 32.6, 24.9, 31.3, 25.7, 33.5, 23.8

Y: 11.9, 26.4, 9.7, 17.3, 12.8, 68.3

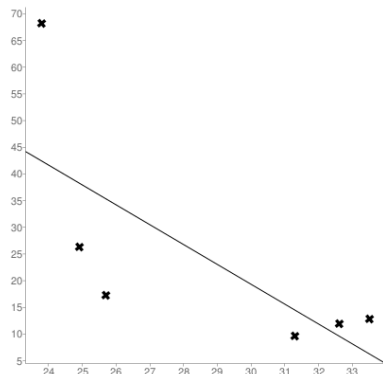

Sample size: 6

Mean  $\bar{x}$ : 28.6333333333333

Mean  $\bar{y}$ : 24.4

Intercept (a): 130.98043274432

Slope (b): -3.7222502704653

Regression line equation:  $y = 130.98043274432 - 3.7222502704653x$

Correlation coefficient (r): -0.71738007453322

$r^2 = 0.514634171337288$ . The P-Value is 0.108582. The result is not significant at  $p < 0.05$

### 3R

X: 36.5, 27.9, 37.0, 20.1, 29.8, 27.1

Y: 14.3, 41.4, 11.0, 23.2, 19.6, 59.2

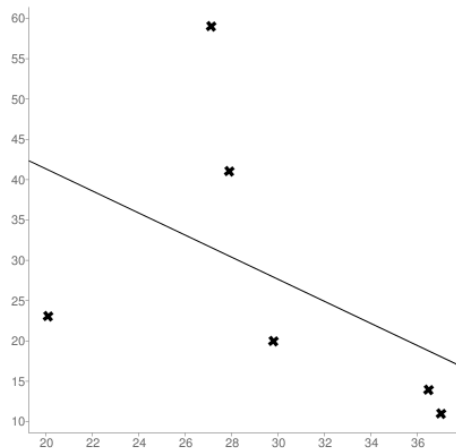

Sample size: 6

Mean  $\bar{x}$ : 29.7333333333333

Mean  $\bar{y}$ : 28

Intercept (a): 68.702254247372

Slope (b): -1.3689098962121

Regression line equation:  $y = 68.702254247372 - 1.3689098962121x$

Correlation coefficient (r): -0.4703369530537

$r^2 = 0.221216849407838$ . The P-Value is 0.346561. The result is not significant at  $p < 0.05$

### 3L

X: 28.4, 23.0, 30.1, 29.5, 38.7, 20.9

Y: 11.9, 44.2, 12.7, 22.3, 15.2, 77.4

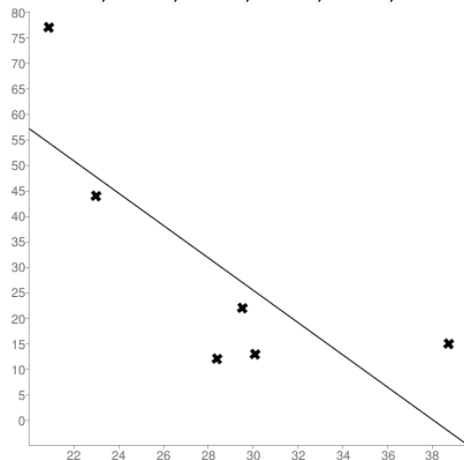

Sample size: 6

Mean  $\bar{x}$ : 28.4333333333333

Mean  $\bar{y}$ : 30.5

Intercept (a): 120.68732744811

Slope (b): -3.1718872490542

Regression line equation:  $y = 120.68732744811 - 3.1718872490542x$

Correlation coefficient (r): -0.7690216794897

$r^2 = 0.591394343525159$ . The P-Value is 0.073878. The result is not significant at  $p < 0.05$

### Autosomes only

X: 32.6, 24.9, 31.3, 25.7, 33.5, 23.8, 36.5, 27.9, 37.0, 20.1, 29.8, 27.1, 28.4, 23.0, 30.1, 29.5, 38.7, 20.9

Y: 11.9, 26.4, 9.7, 17.3, 12.8, 68.3, 14.3, 41.4, 11.0, 23.2, 19.6, 59.2, 11.9, 44.2, 12.7, 22.3, 15.2, 77.4

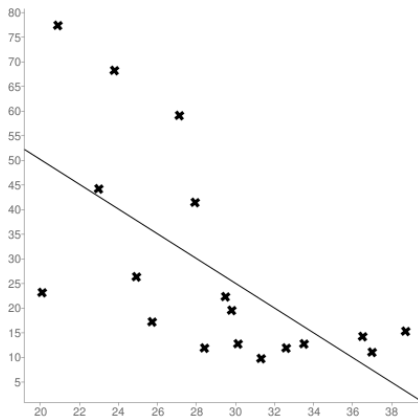

Sample size: 18

Mean  $\bar{x}$ : 28.933333333333

Mean  $\bar{y}$ : 27.711111111111

Intercept (a): 100.38168863779

Slope (b): -2.5116559053

Regression line equation:  $y = 100.38168863779 - 2.5116559053x$

Correlation coefficient (r): -0.63801531852297

$r^2 = 0.407063546669967$ . The P-Value is 0.004387. The result is significant at  $p < 0.05$

### All chromosomes

X: 21.1, 30.7, 24.2, 28.8, 33.8, 23.1, 32.6, 24.9, 31.3, 25.7, 33.5, 23.8, 36.5, 27.9, 37.0, 20.1, 29.8, 27.1, 28.4, 23.0, 30.1, 29.5, 38.7, 20.9

Y: 7.2, 24.8, 10.3, 12.5, 10.1, 41.8, 11.9, 26.4, 9.7, 17.3, 12.8, 68.3, 14.3, 41.4, 11.0, 23.2, 19.6, 59.2, 11.9, 44.2, 12.7, 22.3, 15.2, 77.4

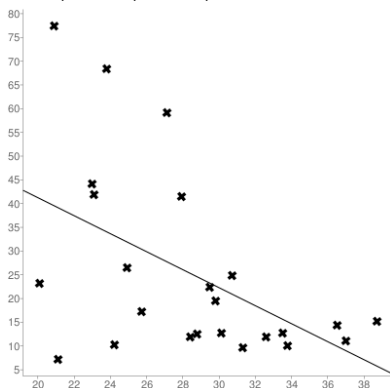

Sample size: 24

Mean  $\bar{x}$ : 28.4375

Mean  $\bar{y}$ : 25.229166666667

Intercept (a): 79.127507375068

Slope (b): -1.8953262666691

Regression line equation:  $y = 79.127507375068 - 1.8953262666691x$

Correlation coefficient (r): -0.50303107007093

$r^2 = 0.253040257456705$ . The P-Value is 0.012233. The result is significant at  $p < 0.05$
